# Supplementary material for: Long-Term Weight Loss Effects of a Behavioral Weight Management Program: Does the Community Food Environment Matter?
Source: Int J Environ Res Public Health. 2018 Jan 26;15(2):211. doi: 10.3390/ijerph15020211 (PMC5858280; doi:10.3390/ijerph15020211)
Supplement: Supplementary file 1 [file ijerph-15-00211-s001.xlsx]

## Sheet: All time pnts & 18 mo
MOVE! effect on BMI at 6, 12, 18, and 24 months by food outlet access for (a) patients with complete data (all timepoints) and (b) patients with at least baseline and 18 month observations
		All Timepoints								18 Month Subsample
		Male				Female				Male				Female
	Months	6	12	18	24	6	12	18	24	6	12	18	24	6	12	18	24		Make sure male/female match what is decided in paper
MOVE! participation		-0.640***	0.051	0.035	-0.000	-0.543***	0.143	-0.008	-0.069	-0.648***	0.086**	0.053*	-0.013	-0.513***	0.095	-0.003	-0.021
		(0.029)	(0.030)	(0.028)	(0.032)	(0.079)	(0.086)	(0.082)	(0.100)	(0.026)	(0.028)	(0.026)	(0.032)	(0.075)	(0.083)	(0.073)	(0.098)
Supermarkets
	1+ Store	0.014	0.016	-0.029	-0.054	0.019	0.073	0.065	-0.090	0.005	0.014	-0.026	-0.045	0.039	0.048	0.081	-0.048
		(0.031)	(0.033)	(0.026)	(0.036)	(0.069)	(0.091)	(0.085)	(0.114)	(0.026)	(0.031)	(0.024)	(0.035)	(0.063)	(0.084)	(0.074)	(0.107)
Convenience Stores
	1 - 2 Stores	0.083*	-0.006	0.077*	-0.088*	-0.025	-0.132	0.071	0.101	0.093**	-0.019	0.073*	-0.091*	-0.056	-0.079	-0.022	0.104
		(0.037)	(0.040)	(0.035)	(0.045)	(0.105)	(0.122)	(0.116)	(0.157)	(0.033)	(0.038)	(0.032)	(0.044)	(0.088)	(0.118)	(0.109)	(0.147)
	3 - 5 Stores	0.072	0.009	0.053	-0.033	0.120	0.066	0.074	-0.011	0.076	0.016	0.047	-0.036	0.117	0.117	-0.050	0.012
		(0.048)	(0.044)	(0.043)	(0.052)	(0.131)	(0.153)	(0.130)	(0.161)	(0.040)	(0.044)	(0.039)	(0.051)	(0.107)	(0.151)	(0.124)	(0.152)
	6+ Stores	0.154**	-0.004	0.070	-0.017	0.085	0.073	0.091	-0.050	0.156***	-0.006	0.063	-0.025	0.053	0.178	0.001	-0.059
		(0.051)	(0.049)	(0.044)	(0.060)	(0.160)	(0.177)	(0.148)	(0.182)	(0.042)	(0.047)	(0.041)	(0.058)	(0.138)	(0.186)	(0.135)	(0.173)
Fast Food Restaurants
	1-4 Restaurants	0.036	-0.041	-0.008	0.116**	-0.027	-0.052	-0.133	-0.013	0.043	-0.033	-0.016	0.113**	-0.004	-0.022	-0.121	-0.063
		(0.040)	(0.043)	(0.036)	(0.044)	(0.103)	(0.118)	(0.111)	(0.135)	(0.035)	(0.041)	(0.033)	(0.043)	(0.091)	(0.105)	(0.098)	(0.132)
	5-11 Restaurants	0.027	-0.053	-0.028	0.110	-0.018	-0.188	-0.103	0.059	0.014	-0.043	-0.026	0.105	-0.015	-0.178	-0.075	-0.007
		(0.053)	(0.057)	(0.042)	(0.056)	(0.124)	(0.176)	(0.142)	(0.173)	(0.045)	(0.053)	(0.039)	(0.055)	(0.114)	(0.157)	(0.124)	(0.167)
	12+ Restaurants	0.023	-0.112	-0.030	0.086	-0.204	-0.050	-0.107	0.234	0.027	-0.112	-0.030	0.080	-0.199	-0.082	-0.107	0.174
		(0.059)	(0.061)	(0.049)	(0.064)	(0.148)	(0.174)	(0.173)	(0.199)	(0.052)	(0.058)	(0.045)	(0.063)	(0.130)	(0.163)	(0.156)	(0.188)

## Sheet: Super + grocery
MOVE! effect on BMI at 6, 12, 18, and 24 months by food outlet access, including supermarket and grocery stores combined
		Male				Female
	Months	6	12	18	24	6	12	18	24
MOVE! participation		-0.654***	0.100***	0.047	-0.002	-0.544***	0.108	0.001	0.010
		(0.025)	(0.027)	(0.026)	(0.032)	(0.070)	(0.079)	(0.073)	(0.094)
All Supermarket & Grocery Stores
	Low	-0.000	-0.013	-0.016	-0.037	0.030	0.050	0.015	-0.086
		(0.030)	(0.037)	(0.031)	(0.043)	(0.079)	(0.103)	(0.085)	(0.129)
	Middle	0.060	-0.019	-0.026	-0.063	0.083	0.162	0.003	-0.090
		(0.036)	(0.041)	(0.033)	(0.046)	(0.086)	(0.112)	(0.108)	(0.134)
	High	0.064	-0.026	-0.032	-0.091	0.084	-0.002	0.049	-0.092
		(0.041)	(0.042)	(0.037)	(0.052)	(0.102)	(0.135)	(0.121)	(0.148)
Convenience Stores
	1 - 2 Stores	0.097**	-0.024	0.075*	-0.092*	-0.059	-0.084	-0.032	0.105
		(0.032)	(0.036)	(0.032)	(0.042)	(0.085)	(0.116)	(0.108)	(0.147)
	3 - 5 Stores	0.085*	0.002	0.048	-0.037	0.082	0.094	-0.052	-0.009
		(0.039)	(0.043)	(0.038)	(0.049)	(0.107)	(0.145)	(0.119)	(0.150)
	6+ Stores	0.158***	-0.027	0.060	-0.025	-0.008	0.173	-0.004	-0.089
		(0.041)	(0.046)	(0.041)	(0.059)	(0.145)	(0.183)	(0.133)	(0.173)
Fast Food Restaurants
	1-4 Restaurants	0.031	-0.015	-0.029	0.104*	0.009	-0.016	-0.111	-0.002
		(0.033)	(0.039)	(0.033)	(0.041)	(0.086)	(0.102)	(0.099)	(0.125)
	5-11 Restaurants	-0.003	-0.015	-0.044	0.102	-0.034	-0.158	-0.050	0.071
		(0.042)	(0.049)	(0.039)	(0.054)	(0.106)	(0.152)	(0.124)	(0.155)
	12+ Restaurants	0.015	-0.081	-0.058	0.089	-0.204	-0.026	-0.109	0.224
		(0.048)	(0.054)	(0.044)	(0.060)	(0.124)	(0.157)	(0.155)	(0.177)

## Sheet: Large chain supermarket
MOVE! effect on BMI at 6, 12, 18, and 24 months by food outlet access, including large chain supermarkets
		Male				Female
	Months	6	12	18	24	6	12	18	24
MOVE! participation		-0.657***	0.101***	0.048	-0.002	-0.542***	0.108	0.004	0.003
		(0.025)	(0.027)	(0.026)	(0.031)	(0.070)	(0.079)	(0.073)	(0.094)
Large Chain Supermarkets
	1+ Stores	0.004	0.019	-0.028	0.020	0.010	0.053	0.047	-0.089
		(0.023)	(0.030)	(0.025)	(0.030)	(0.061)	(0.071)	(0.071)	(0.090)
Convenience Stores
	1 - 2 Stores	0.097**	-0.026	0.076*	-0.100*	-0.046	-0.071	-0.033	0.089
		(0.031)	(0.036)	(0.032)	(0.042)	(0.084)	(0.114)	(0.108)	(0.144)
	3 - 5 Stores	0.089*	0.002	0.052	-0.054	0.115	0.113	-0.044	-0.035
		(0.037)	(0.043)	(0.037)	(0.048)	(0.102)	(0.138)	(0.120)	(0.142)
	6+ Stores	0.165***	-0.024	0.067	-0.052	0.044	0.159	0.021	-0.124
		(0.039)	(0.045)	(0.039)	(0.055)	(0.133)	(0.178)	(0.131)	(0.165)
Fast Food Restaurants
	1-4 Restaurants	0.031	-0.017	-0.027	0.095*	0.018	-0.003	-0.113	-0.012
		(0.033)	(0.038)	(0.032)	(0.041)	(0.084)	(0.099)	(0.097)	(0.126)
	5-11 Restaurants	0.005	-0.024	-0.038	0.076	-0.007	-0.136	-0.058	0.064
		(0.043)	(0.049)	(0.038)	(0.053)	(0.105)	(0.150)	(0.121)	(0.159)
	12+ Restaurants	0.027	-0.093	-0.046	0.050	-0.168	-0.036	-0.112	0.222
		(0.050)	(0.054)	(0.044)	(0.061)	(0.125)	(0.154)	(0.154)	(0.181)

## Sheet: Chain, nonchain FFR
MOVE! effect on BMI at 6, 12, 18, and 24 months by food outlet access, including chain and non-chain fast food restaurants
		Male				Female
	Months	6	12	18	24	6	12	18	24
MOVE! participation		-0.500***	0.123***	0.101***	0.045	-0.430***	0.243*	0.049	0.032
		(0.023)	(0.027)	(0.024)	(0.032)	(0.088)	(0.101)	(0.080)	(0.091)
Supermarkets
	1+ Store	0.015	0.008	0.001	-0.055	0.025	0.095	0.119	-0.079
		(0.034)	(0.031)	(0.027)	(0.039)	(0.069)	(0.092)	(0.081)	(0.112)
Convenience Stores
	1 - 2 Stores	0.073*	-0.021	0.044	-0.072	-0.078	-0.013	-0.081	-0.037
		(0.031)	(0.037)	(0.033)	(0.046)	(0.094)	(0.160)	(0.145)	(0.160)
	3 - 5 Stores	0.072	-0.033	0.028	-0.039	0.011	0.217	-0.184	-0.110
		(0.047)	(0.045)	(0.040)	(0.055)	(0.113)	(0.215)	(0.224)	(0.160)
	6+ Stores	0.108	-0.045	0.015	-0.041	0.001	0.209	-0.127	-0.119
		(0.061)	(0.050)	(0.045)	(0.060)	(0.149)	(0.252)	(0.197)	(0.203)
Chain Fast Food Restaurants
	1-2 Restaurants	-0.031	-0.019	-0.004	0.009	0.027	-0.200	0.004	-0.090
		(0.030)	(0.041)	(0.036)	(0.041)	(0.080)	(0.156)	(0.131)	(0.142)
	3-6 Restaurants	0.002	-0.030	-0.014	0.056	-0.139	-0.263	-0.029	-0.035
		(0.051)	(0.046)	(0.043)	(0.048)	(0.097)	(0.171)	(0.143)	(0.151)
	7+ Restaurants	0.014	-0.017	-0.048	0.023	-0.070	-0.243	-0.055	0.101
		(0.066)	(0.051)	(0.045)	(0.051)	(0.115)	(0.174)	(0.156)	(0.159)
Non-chain Fast Food Restaurants
	1-2 Restaurants	0.072*	-0.019	-0.035	0.062	0.124	-0.007	-0.032	-0.058
		(0.032)	(0.038)	(0.034)	(0.044)	(0.084)	(0.146)	(0.104)	(0.143)
	3-6 Restaurants	0.057	-0.009	-0.018	0.076	0.044	0.172	0.004	0.012
		(0.041)	(0.043)	(0.041)	(0.050)	(0.098)	(0.156)	(0.128)	(0.161)
	7+ Restaurants	0.095*	-0.056	0.010	0.055	-0.150	0.212	-0.012	-0.202
		(0.047)	(0.051)	(0.046)	(0.062)	(0.130)	(0.181)	(0.168)	(0.198)

## Sheet: Relative accessibility
MOVE! effect on BMI at 6, 12, 18, and 24 months by food outlet access, including relative accessibility of supermarkets to fast food restaurants
		Male				Female
	Months	6	12	18	24	6	12	18	24
MOVE! participation		-0.465***	0.109**	0.079*	0.127**	-0.458***	0.164	0.116	0.031
		(0.037)	(0.042)	(0.037)	(0.047)	(0.100)	(0.155)	(0.141)	(0.147)
Relative accessibility of supermarkets to fast food restaurants
	Low	0.080	-0.060	-0.010	-0.018	-0.114	0.153	0.038	-0.215
		(0.069)	(0.044)	(0.041)	(0.054)	(0.111)	(0.135)	(0.094)	(0.173)
	Low-middle	-0.012	-0.005	0.021	-0.075	-0.109	0.030	0.119	0.074
		(0.041)	(0.038)	(0.036)	(0.049)	(0.089)	(0.115)	(0.091)	(0.133)
	Middle-high	0.016	0.032	-0.017	-0.050	0.150	0.092	0.097	-0.125
		(0.035)	(0.039)	(0.030)	(0.050)	(0.120)	(0.115)	(0.094)	(0.126)
	High	-0.033	0.012	0.020	-0.093*	0.076	0.084	-0.099	-0.023
		(0.036)	(0.041)	(0.036)	(0.046)	(0.093)	(0.196)	(0.183)	(0.151)
Convenience Stores
	1 - 2 Stores	0.075*	-0.032	0.042	-0.077	-0.041	-0.041	-0.118	-0.069
		(0.032)	(0.038)	(0.034)	(0.046)	(0.093)	(0.160)	(0.149)	(0.166)
	3 - 5 Stores	0.079	-0.044	0.020	-0.035	0.042	0.175	-0.236	-0.133
		(0.046)	(0.045)	(0.040)	(0.054)	(0.106)	(0.202)	(0.225)	(0.165)
	6+ Stores	0.122*	-0.058	0.008	-0.041	-0.008	0.187	-0.177	-0.150
		(0.056)	(0.048)	(0.044)	(0.055)	(0.137)	(0.227)	(0.192)	(0.199)

## Sheet: 3 miles
MOVE! effect on BMI at 6, 12, 18, and 24 months by food outlet access at 3 miles
		Male				Female
	Months	6	12	18	24	6	12	18	24
MOVE! participation		-0.694***	0.137***	0.030	0.042	-0.614***	0.150	-0.046	0.017
		(0.030)	(0.034)	(0.033)	(0.038)	(0.091)	(0.095)	(0.092)	(0.122)
All supermarkets
	Low	0.050	-0.056	0.023	-0.032	0.125	-0.172	0.152	-0.090
		(0.037)	(0.042)	(0.039)	(0.049)	(0.102)	(0.125)	(0.113)	(0.137)
	Middle	0.026	-0.054	0.014	0.020	0.228	0.049	0.010	-0.013
		(0.045)	(0.051)	(0.046)	(0.056)	(0.119)	(0.147)	(0.138)	(0.164)
	High	0.055	-0.080	0.024	-0.014	0.314*	-0.019	0.144	-0.201
		(0.065)	(0.057)	(0.054)	(0.066)	(0.136)	(0.175)	(0.155)	(0.189)
Convenience Stores
	7-18 Stores	0.088**	-0.015	0.071*	-0.088*	-0.072	-0.049	-0.032	0.064
		(0.031)	(0.036)	(0.032)	(0.043)	(0.085)	(0.119)	(0.112)	(0.146)
	19-26 Stores	0.074*	0.015	0.049	-0.041	0.077	0.144	-0.036	-0.095
		(0.037)	(0.041)	(0.037)	(0.049)	(0.104)	(0.144)	(0.129)	(0.148)
	37+ Stores	0.130**	-0.003	0.070	-0.044	-0.030	0.215	0.013	-0.206
		(0.041)	(0.045)	(0.040)	(0.055)	(0.137)	(0.180)	(0.144)	(0.177)
All fast food
	14-39 Restaurants	0.017	0.002	-0.036	0.112**	-0.014	0.013	-0.119	-0.022
		(0.033)	(0.039)	(0.034)	(0.043)	(0.087)	(0.103)	(0.099)	(0.129)
	40-75 Restaurants	-0.011	0.004	-0.052	0.097	-0.057	-0.115	-0.049	0.029
		(0.041)	(0.048)	(0.039)	(0.054)	(0.104)	(0.149)	(0.118)	(0.155)
	76+ Restaurants	0.002	-0.059	-0.064	0.075	-0.238	0.006	-0.112	0.184
		(0.046)	(0.053)	(0.044)	(0.060)	(0.123)	(0.151)	(0.146)	(0.173)

## Sheet: 0.5 mile
MOVE! effect on BMI at 6, 12, 18, and 24 months by food outlet access at 0.5 miles
		Male				Female
	Months	6	12	18	24	6	12	18	24
MOVE! participation		-0.474***	0.110***	0.110***	0.035	-0.422***	0.242**	0.015	-0.043
		(0.022)	(0.025)	(0.023)	(0.030)	(0.068)	(0.093)	(0.077)	(0.094)
Supermarkets
	1+ Stores	0.028	-0.061*	0.025	-0.030	-0.004	0.071	0.043	-0.187
		(0.027)	(0.030)	(0.025)	(0.035)	(0.072)	(0.097)	(0.081)	(0.136)
Convenience Store
	1+ Stores	0.032	-0.002	0.005	0.005	0.110	0.085	0.068	-0.079
		(0.026)	(0.030)	(0.032)	(0.031)	(0.077)	(0.101)	(0.086)	(0.099)
Fast Food Restaurants
	1+ Restaurants	0.073*	-0.003	-0.054*	0.047	0.026	-0.203*	-0.071	0.176
		(0.034)	(0.030)	(0.027)	(0.032)	(0.073)	(0.096)	(0.090)	(0.116)

## Sheet: Distance
MOVE! effect on BMI at 6, 12, 18, and 24 months by distance (in miles) to the nearest food outlet
		Male				Female
	Months	6	12	18	24	6	12	18	24
MOVE! participation		-0.472***	0.036*	0.012	0.032*	-0.435***	0.002	-0.044	-0.075
		(0.020)	(0.014)	(0.014)	(0.014)	(0.034)	(0.040)	(0.038)	(0.049)
Fast food restaurants, nearest distance
		0.006	-0.015	0.003	0.003	0.011	0.032	0.097**	-0.025
		(0.011)	(0.013)	(0.011)	(0.015)	(0.030)	(0.041)	(0.036)	(0.048)
Supermarkets, nearest distance
		-0.006	0.006	0.014	0.002	-0.017	0.005	-0.035	-0.014
		(0.008)	(0.009)	(0.007)	(0.010)	(0.021)	(0.023)	(0.022)	(0.031)
Convenience stores, nearest distance
		-0.020*	0.004	-0.013	-0.010	0.013	0.007	-0.069**	0.047
		(0.008)	(0.010)	(0.009)	(0.012)	(0.024)	(0.030)	(0.027)	(0.040)
